# Supplementary material for: The motor system is exceptionally vulnerable to absence of the ubiquitously expressed superoxide dismutase-1
Source: PubMed Central journal article supplement (PMC9924500; doi:10.1093/braincomms/fcad017), 2023-01-27
Supplement: fcad017_supplementary_data.pdf [file fcad017_supplementary_data.pdf]

## SUPPLEMENTARY MATERIAL

### **The motor system is exceptionally vulnerable to absence of the ubiquitously expressed superoxide dismutase-1**

Julien H. Park,<sup>1,2</sup> Ulrika Nordström,<sup>1</sup> Konstantinos Tsiakas,<sup>3</sup> Isil Keskin,<sup>4</sup> Christiane Elpers,<sup>2</sup> Manoj Mannil,<sup>5</sup> Raoul Heller,<sup>6</sup> Melinda Nolan,<sup>6</sup> Salam Alburaiqy,<sup>6</sup> Per Zetterström,<sup>7</sup> Maja Hempel,<sup>3,8</sup> Ulrike Schara,<sup>9</sup> Saskia Biskup,<sup>10</sup> Petra Steinacker,<sup>11</sup> Markus Otto,<sup>11</sup> Jochen Weishaupt,<sup>12</sup> Andreas Hahn,<sup>13</sup> René Santer,<sup>3</sup> Thorsten Marquardt,<sup>2</sup> Stefan L. Marklund,<sup>7</sup> and Peter M. Andersen<sup>1</sup>

#### **Author affiliations:**

<sup>1</sup> Department of Clinical Sciences, Neurosciences, Umeå University, 901 87, Umeå, Sweden.

<sup>2</sup> Department of General Paediatrics, University of Münster, 48149 Münster, Germany.

<sup>3</sup> Department of Paediatrics, University Medical Centre Hamburg-Eppendorf, 20251 Hamburg, Germany.

<sup>4</sup> Department of Medical Biosciences, Pathology, Umeå University, 901 87, Umeå, Sweden.

<sup>5</sup> Clinic for Radiology, University Hospital Münster, WWU University of Münster, 48149 Münster, Germany.

<sup>6</sup> Starship Children's Health, Auckland City Hospital, Auckland 1142, New Zealand. <sup>7</sup> Department of Medical Biosciences, Clinical Chemistry, Umeå University, 907 36 Umeå, Sweden.

<sup>8</sup> Current address: Institute of Human Genetics, University Hospital Heidelberg, 69120 Heidelberg, Germany

<sup>9</sup> Department of Paediatric Neurology, University Hospital Essen, 39081 Essen, Germany.

<sup>10</sup> CeGAT GmbH and Praxis für Humangenetik Tübingen, 72076 Tübingen, Germany.

<sup>11</sup> Department of Neurology, Martin-Luther-University Halle-Wittenberg, 06120 Halle (Saale), Germany.

<sup>12</sup> Division for Neurodegenerative Diseases, Department of Neurology, Medical Faculty Mannheim, University of Heidelberg, 68167 Mannheim, Germany.

<sup>13</sup> Department of Child Neurology, Justus Liebig University, 35392 Giessen, Germany.

Correspondence to: Peter Munch Andersen

Department of Clinical Science, Neurosciences, Umeå University, SE-901 85 Umeå, Sweden.

Email: [Peter.Andersen@umu.se](mailto:Peter.Andersen@umu.se)

Mobile: +46 70 647 6913

Office: +46 90 785 2372

ORCID# 0000-0003-0094-5429

## TABLE OF CONTENTS

|                                                                                                                                                       |    |
|-------------------------------------------------------------------------------------------------------------------------------------------------------|----|
| Supplementary Phenotype Data                                                                                                                          | 4  |
| Supplementary Table 1 – Demographic data of C112X <sup>Het</sup> individuals                                                                          | 10 |
| Supplementary Table 2 – Clinical presentation of Infantile Superoxide<br>dismutase 1 deficiency syndrome (ISODDES) (extension of Table 1)             | 11 |
| Supplementary Table 3 – Clinical Chemistry analysis                                                                                                   | 12 |
| Supplementary Table 4 – Complete blood counts                                                                                                         | 17 |
| Supplementary Table 5 – Comparison of C112X <i>SOD1</i> homozygous<br>ISODDES with D90A <i>SOD1</i> homozygous and G127X <i>SOD1</i> heterozygous ALS | 23 |
| Supplementary Methods                                                                                                                                 | 24 |
| Uncropped blots for Figures 3 and 4                                                                                                                   | 26 |
| References                                                                                                                                            | 28 |

## I. Supplementary Phenotype Data

### Clinical presentations

#### Family A

The index patient in this family (patient 1) has been described in detail elsewhere (Park *et al.*, 2019). Briefly, the patient developed a progressive loss of motor functions from the 9<sup>th</sup> month of life onwards. The initially reported symptom was muscular hypotonia. He presented with tetraspasticity, hyperreflexia, inexhaustible myoclonus, and a bilateral Babinski's sign.

Intermittent fasciculations, muscular atrophy, and truncal muscular hypotonia were identified as signs of secondary motor neuron involvement. In addition, a positive glabellar tap sign was present while no other signs of frontal release could be noted. The patient was initially started on oral ascorbic acid (up to 200 mg tid) but this was discontinued following nausea and malaise, which quickly resolved after discontinuation. *N*-acetylcysteine (NAC) was then introduced as a redox scavenger and increased stepwise to a final dose of 30 mg/kg BW/d. A clinical reassessment at the age of eight years revealed persistence of the above-mentioned symptoms indicating no change in severity. During periods of emotional stress, the patient showed episodes of cyanosis and profuse sweating that were self-limiting upon removal of the stressor.

Patient 6, a paternal as well as maternal cousin of patient 1 is the child of consanguineous parents of Afghan origin. The girl was born after an uneventful pregnancy as the fourth child of the union. Muscular hypotonia was noted at the age of six to seven months and was reported to progress over the following months. She was evaluated genetically for spinal muscular atrophy (SMA) with reportedly normal results. After patient 1 was diagnosed, conventional Sanger sequencing of *SOD1* identified the c.335dupG (p.C112Wfs\*11) mutation in *SOD1*. At the age of five years, she presented with truncal muscular hypotonia in

conjunction with peripheral spasticity. Dysmorphic features were present in the form of lowset ears and overlapping toes.

In this family, no cases of ALS were reported. No symptoms suggestive of neurodegenerative disorders were present at the time of this report in any of the patients' relatives who are heterozygous for the C112X SOD1 mutation.

### **Family B**

The index patient in this family (patient 2) was the subject of a previous description<sup>2</sup>. She is the third child of consanguineous parents of Afghan origin and was born at term via Caesarean section. Although clinically uneventful, the pregnancy was marked by sparse intrauterine movements of the child as per the mother's retrospective assessment. At the age of six months, generalized muscular hypotonia was noted. Over the course of the following year, severe tetraspasticity with brisk deep tendon reflexes and broadened reflex zones developed. Unilateral Babinski's sign (right side) was noted while bulbar signs such as tongue fasciculations and atrophy were absent. Frequent episodes of a pathological autonomous stress response consisting of hyperhidrosis, cyanosis, and periphery vasoconstriction occurred in situations such as blood tapping or emotionally stressful situations. Due to the underlying mutation and hypothesized pathomechanism, oral ascorbate substitution (100 mg tid) was introduced. Following several months of ascorbate substitution, the parents reported improved head control.

At the time of this report, the patient was four years old. She presented with severe spastic tetraparesis with inexhaustible myoclonus and hyperreflexia in combination with axial hypotonia marked by severely reduced albeit slightly improved head control. In comparison to the previous description, an incomplete Babinski sign was noted bilaterally. Furthermore, she developed signs of frontal involvement with affect lability and a Glabellar tap sign. The

parents reported progressive difficulties swallowing liquids, indicating the development of dysphagia.

While no relatives with an ALS-like disorder were reported in this family, the parent's first daughter suffered from a disease with a very similar course to that of the index patient who died at the age of six years. In addition, a second pregnancy was complicated by enhanced nuchal translucency at 13 weeks, oligohydramnion, and hypotrophic kidneys. Chromosomal analysis revealed a normal female karyotype. However, this pregnancy was terminated at 21 weeks.

### **Family C**

Patient 3 is the fourth child of consanguineous parents of Afghan origin. The girl was born spontaneously at term after an uneventful pregnancy. The parents reported appropriate development – also when compared to the four older siblings – for the first months of life. Standardized pediatric examinations during the first months of life identified no abnormalities. Directed gripping was possible at the age of 6-7 months, crossing the midline approximately 1 month later. The patient was able to sit without support at the age of 5-6 months.

At the age of 10 months, the patient suffered a febrile respiratory infection. Following this, generalized muscular hypotonia developed and the patient regressed in the previously mentioned milestones of motor development. At the time of evaluation, the patient was four years old. She presented with severe truncal muscular hypotonia with no head control, which was accompanied by severe spasticity of the extremities with hyperreflexia and vastly broadened reflex zones. Bilateral Babinski's sign was present while other pyramidal tract signs were not noted. In addition to these signs of upper motor neuron involvement, the girl showed lower motor neuron signs consisting of generalized muscular atrophy and intermittent

fasciculations. Severe dysphagia as well as tongue atrophy and fasciculations were bulbar symptoms seen in this patient. No signs of frontal involvement were noted.

Ophthalmological examination revealed bilateral optic nerve atrophy.

### **Family D**

Patients 4 and 5 are the children of a consanguineous couple (first degree cousins with multiple consanguineous unions on both sides of the family) of Afghan origin. Patient 4 is a 13-year-old girl who was born after an uneventful pregnancy. The initial development was reported to have been regular. According to the parents, motor impairment was first noted around the age of one year, when the patient was able to walk with support but began showing signs of muscular hypotonia. Her condition deteriorated over the course of several months and the patient developed tetraspasticity with truncal hypotonia resulting in poor head control.

At the age of 13 years, the patient presented with pronounced tetraspasticity in conjunction with truncal muscular hypotonia. Severe spastic dysarthria led to impairment of verbal communication. In term of UMNS, unilateral Babinski's sign, pronounced hyperreflexia, and bilateral loss of the abdominal reflex were present. Signs of LMNS consisted of generalized muscular atrophy, muscular hypotonia, and intermittent fasciculations. Furthermore, dysphagia as well as tongue atrophy and fasciculations indicated bulbar involvement.

Following several years of disease course, the patient began to develop intermittent episodes of inappropriate laughter and other emotional reactions. However, no frontal release signs were seen in the physical examination. Despite initially age-adequate development of urinary continence, incontinence developed at the age of 13 years. Fecal continence was preserved although the patient has been suffering from chronic obstipation since early childhood.

Patient 5, the younger brother of patient 4, was born at a gestational age of 30 weeks followed by complicated postnatal adaptation, which reportedly resolved without sequelae.

Delayed motor development was noted at the age of approximately 12 months. At the age of 10 years, he presented with symmetric bilateral spasticity and hyperreflexia. Truncal hypotonia and generalized muscular atrophy in conjunction with intermittent fasciculations were also noted. Bulbar symptoms included dysphagia and spastic dysarthria, making verbal communication impossible. Similarly, to the symptoms observed in his sister, the boy developed inappropriate emotional reactions at the age of 9-10 years. The glabellar reflex, a frontal release sign, was an additional indication of frontal lobe involvement. Urinary and fecal incontinence were also seen, as was an inappropriate stress response consisting of hyperhydrosis and facial discoloration.

No diagnosed cases of ALS were reported in this family. A maternal great-grandfather of the patients was reported to have suffered from a sudden onset of paresis in one shoulder, spreading distally and eventually rendering him bedridden. He reportedly died shortly afterwards. No diagnosis was made at the time and no medical records were available for review.

### **Family E**

Patients 7 and 8 are the children of consanguineous parents of Afghan origin.

Patient 7 is a currently 9-year-old girl who was born at term after an uneventful pregnancy with reportedly normal development until the age of 5 months, when she began to exhibit muscle weakness. No sitting or head control were achieved, and the patient remains a verbal. At the time of evaluation, she exhibited severe truncal hypotonia in conjunction with limb spasticity and multiple contractures requiring the use of a wheelchair. Bulbar symptoms in the form of dysphagia were present. Of note, optic atrophy was noted in ophthalmological examination.



Patient 8 was equally born after an uneventful pregnancy followed by a normal postnatal adaptation. Symptoms were first noted within the first year of life, with pronounced head lag and truncal muscular hypotonia in addition to limb hypertonia. At the time of evaluation, bilateral lower limb spasticity accompanied by truncal hypotonia was detected. No verbal expression except babbling was possible. RMI imaging at the age of 2 years identified hydrocephalus requiring ventriculo-peritoneal (VP) shunt treatment. Both patients exhibited distress-provoked breath-holding type spells with extensor posturing akin to decerebrate posture that resolved spontaneously. Initially interpreted in patient 8 as seizures, these were treated with levetiracetam to no avail and treatment was discontinued.

**II. Supplementary Table 1.**  
**Demographic data of C112X<sup>Het</sup> individuals**

|                                    | parents |        |        |        |        |        |        | siblings |         |        |        |        |
|------------------------------------|---------|--------|--------|--------|--------|--------|--------|----------|---------|--------|--------|--------|
| <b>Individual</b>                  | 1.2     | 1.3    | 2.2    | 2.3    | 3.2    | 3.3    | 4.2    | 4.3      | 4.4     | 3.4    | 3.5    | 3.6    |
| <b>Family</b>                      | A       | A      | B      | B      | C      | C      | D      | D        | A       | C      | C      | C      |
| <b>Sex</b>                         | male    | female | male   | female | male   | female | male   | female   | male    | female | female | female |
| <b>Age</b>                         | 45      | 36     | 41     | 35     | 40     | 35     | 38     | 31       | 14      | 15     | 14     | 12     |
| <b>Relation to index in family</b> | father  | mother | father | mother | father | mother | father | mother   | brother | sister | sister | sister |

### III. Supplementary Table 2.

## Clinical presentation of Infantile Superoxide dismutase 1 deficiency syndrome (Extension of Table 1)

|                                        | Patient 1 <sup>†</sup>                                                                                                                                                                                                                                        | Patient 2 <sup>‡</sup>                                                                                                                                                                                          | Patient 3                                                                                                                                                                                                                                             | Patient 4                                                                                                                                                                                                                   | Patient 5                                                                                                                                                                                                                   | Patient 6                                                                                                     | Patient 7                                                                                                                                                        | Patient 8                                                                                                                                                                                        |
|----------------------------------------|---------------------------------------------------------------------------------------------------------------------------------------------------------------------------------------------------------------------------------------------------------------|-----------------------------------------------------------------------------------------------------------------------------------------------------------------------------------------------------------------|-------------------------------------------------------------------------------------------------------------------------------------------------------------------------------------------------------------------------------------------------------|-----------------------------------------------------------------------------------------------------------------------------------------------------------------------------------------------------------------------------|-----------------------------------------------------------------------------------------------------------------------------------------------------------------------------------------------------------------------------|---------------------------------------------------------------------------------------------------------------|------------------------------------------------------------------------------------------------------------------------------------------------------------------|--------------------------------------------------------------------------------------------------------------------------------------------------------------------------------------------------|
| <b>Family</b>                          | A                                                                                                                                                                                                                                                             | D                                                                                                                                                                                                               | C                                                                                                                                                                                                                                                     | D                                                                                                                                                                                                                           | D                                                                                                                                                                                                                           | A                                                                                                             | E                                                                                                                                                                | E                                                                                                                                                                                                |
| <b>Sex</b>                             | male                                                                                                                                                                                                                                                          | female                                                                                                                                                                                                          | female                                                                                                                                                                                                                                                | female                                                                                                                                                                                                                      | male                                                                                                                                                                                                                        | female                                                                                                        | female                                                                                                                                                           | male                                                                                                                                                                                             |
| <b>Age at evaluation</b>               | 8 years                                                                                                                                                                                                                                                       | 4 years                                                                                                                                                                                                         | 4 years                                                                                                                                                                                                                                               | 13 years                                                                                                                                                                                                                    | 10 years                                                                                                                                                                                                                    | 5 years                                                                                                       | 9 years                                                                                                                                                          | 3 years                                                                                                                                                                                          |
| <b>Reported age of onset</b>           | 9 months                                                                                                                                                                                                                                                      | 6 months                                                                                                                                                                                                        | 10 months                                                                                                                                                                                                                                             | 9 - 12 months                                                                                                                                                                                                               | approx. 12 months                                                                                                                                                                                                           | 6-7 months                                                                                                    | 5 months                                                                                                                                                         | 5 months                                                                                                                                                                                         |
| <b>Initial symptom</b>                 | truncal muscular hypotonia<br>delayed motor development                                                                                                                                                                                                       | generalized muscular hypotonia                                                                                                                                                                                  | generalized muscular hypotonia following<br>febrile respiratory infection                                                                                                                                                                             | truncal muscular hypotonia<br>delayed motor development                                                                                                                                                                     | lack of motor development                                                                                                                                                                                                   | lack of motor development                                                                                     | muscular hypotonia, developmental delay                                                                                                                          | lower limb spasticity                                                                                                                                                                            |
| <b>Current GMFCS - E&amp;R level</b>   | V                                                                                                                                                                                                                                                             | V                                                                                                                                                                                                               | V                                                                                                                                                                                                                                                     | V                                                                                                                                                                                                                           | V                                                                                                                                                                                                                           | V                                                                                                             | V                                                                                                                                                                | V                                                                                                                                                                                                |
| <b>Communication</b>                   | spastic dysarthria<br>non-verbal communication<br>pointing, head movements                                                                                                                                                                                    | spastic dysarthria<br>vocalizations<br>non-verbal communication<br>pointing, head movements                                                                                                                     | spastic dysarthria                                                                                                                                                                                                                                    | spastic dysarthria<br>single words<br>non-verbal communication<br>pointing, head movements, use of assisting device (tablet<br>computer)                                                                                    | severe spastic dysarthria<br>non-verbal communication<br>pointing, head movements                                                                                                                                           |                                                                                                               | never developed words, babbling then avarbal<br>non-verbal communication<br>eye contact, head movements                                                          | babbled then avarbal<br>non-verbal communication<br>eye contact, vocalisation, pointing                                                                                                          |
| <b>Milestones of motor development</b> | head control:<br>rolling over:<br>sitting:<br>crawling:<br>9 months<br>walking with support:<br>walking unsupported:<br>-                                                                                                                                     | head control: 3 months<br>rolling over: 6 months<br>sitting:<br>crawling:<br>-<br>walking with support:<br>walking unsupported:<br>-                                                                            | head control:<br>-<br>gripping: 6-7 months, lost at the age of 10 months<br>crossing the midline: 7-8 months, lost at the age of 10 months<br>sitting: 5-6 months, lost at the age of 10 months<br>walking with support:<br>walking unsupported:<br>- | head control:<br>-<br>rolling over:<br>-<br>sitting: 7 months<br>crawling:<br>N/A<br>walking with support: 12 months<br>walking unsupported:<br>-                                                                           | head control:<br>-<br>rolling over:<br>-<br>sitting: 8 months<br>crawling:<br>N/A<br>walking with support:<br>walking unsupported:<br>-                                                                                     | head control:<br>-<br>rolling over: N/A<br>sitting: N/A<br>walking with support:<br>walking unsupported:<br>- | head control:<br>-<br>never rolled over or sat or crawled, never walked<br>sitting:<br>-<br>crawling:<br>-<br>walking with support:<br>walking unsupported:<br>- | head control:<br>-<br>briefly able to sit, stand, supported walking (around 1yo) then<br>all regressed, now no head control, cannot sit supported or<br>crawl<br>sitting:<br>-<br>crawling:<br>- |
| <b>Upper motor neuron symptoms</b>     | Babinski's sign L-, R+<br>Gordon's sign L-, R-<br>Oppenheim's sign L-, R-<br><br>bilateral spasticity<br>inextinguishable myoclonus<br>hyperreflexia<br>hyperreactive tendon reflexes<br>broadened reflex zones<br><br>bilateral loss of the abdominal reflex | Babinski's sign L-, R+<br>Gordon's sign L-, R-<br>Oppenheim's sign L-, R-<br><br>bilateral spasticity<br>inextinguishable myoclonus<br>hyperreflexia<br>hyperreactive tendon reflexes<br>broadened reflex zones | Babinski's sign L-, R+<br>Gordon's sign L-, R-<br>Oppenheim's sign L-, R-<br><br>bilateral spasticity<br>brisk, hyperreactive tendon reflexes<br>broadened reflex zones                                                                               | Babinski's sign L+, R-<br>Gordon's sign L-, R-<br>Oppenheim's sign L-, R-<br><br>bilateral spasticity<br>hyperreflexia<br>hyperreactive tendon reflexes<br>broadened reflex zones<br>bilateral loss of the abdominal reflex | Babinski's sign L-, R+<br>Gordon's sign L-, R-<br>Oppenheim's sign L-, R-<br><br>bilateral spasticity<br>hyperreflexia<br>hyperreactive tendon reflexes<br>broadened reflex zones<br>bilateral loss of the abdominal reflex | bilateral spasticity                                                                                          | spastic quadriplegia                                                                                                                                             | spastic quadriplegia                                                                                                                                                                             |
| <b>Lower motor neuron symptoms</b>     | truncal muscular hypotonia<br>mild muscular atrophy                                                                                                                                                                                                           | axial hypotonia                                                                                                                                                                                                 | severe muscular hypotonia<br>generalized muscular atrophy<br>intermittent fasciculations                                                                                                                                                              | muscular hypotonia<br>lack of head control<br><br>generalized muscular atrophy<br>intermittent fasciculations                                                                                                               | severe muscular hypotonia<br>truncal hypotonia<br>generalized muscular atrophy<br>intermittent fasciculations                                                                                                               | muscular hypotonia<br>truncal hypotonia                                                                       | severe muscular hypotonia<br>truncal hypotonia<br>lack of head control                                                                                           | severe muscular hypotonia<br>truncal hypotonia<br>lack of head control                                                                                                                           |
| <b>Bulbar symptoms</b>                 | dysphagia necessitating gastrostomy tube feeding                                                                                                                                                                                                              | dysphagia<br>sialorrhoea                                                                                                                                                                                        | severe dysphagia necessitating gastrostomy tube feeding<br>spastic dysarthria<br>sialorrhoea<br>tongue atrophy<br>tongue fasciculations                                                                                                               | mild dysphagia<br>spastic dysarthria<br>tongue atrophy<br>tongue fasciculations                                                                                                                                             | dysphagia<br>spastic dysarthria<br>sialorrhoea<br>tongue atrophy<br>tongue fasciculations                                                                                                                                   | N/A                                                                                                           | multiphase dysphagia                                                                                                                                             | multiphase dysphagia                                                                                                                                                                             |
| <b>Frontal lobe symptoms</b>           | Glabellar tap sign<br>intermittent inadequate fits of crying                                                                                                                                                                                                  | Glabellar tap sign<br>intermittent inadequate fits of crying                                                                                                                                                    | -                                                                                                                                                                                                                                                     | intermittent inadequate fits of laughter                                                                                                                                                                                    | Glabellar tap sign<br>intermittent inadequate fits of laughter, onset at 9 years of age                                                                                                                                     | N/A                                                                                                           | -                                                                                                                                                                | -                                                                                                                                                                                                |
| <b>Excessive startle reaction</b>      | +                                                                                                                                                                                                                                                             | -                                                                                                                                                                                                               | -                                                                                                                                                                                                                                                     | -                                                                                                                                                                                                                           | -                                                                                                                                                                                                                           | -                                                                                                             | provoked intermittent self-resolving tonic decerebrate posture<br>akin to breath-holding spells, triggered by distress                                           | provoked intermittent self-resolving tonic decerebrate posture<br>akin to breath-holding spells, triggered by distress                                                                           |
| <b>Autonomic symptoms</b>              | urinary and fecal incontinence<br>pathological autonomous stress response<br>intermittent hyperhidrosis                                                                                                                                                       | urinary and fecal incontinence<br>pathological autonomous stress response<br>hyperhidrosis<br>xerosis<br>peripheral vasoconstriction                                                                            | not applicable<br>(formal diagnosis of incontinence not possible due to young<br>age)                                                                                                                                                                 | urinary incontinence<br>age appropriate continence developed, lost at 13 of age<br>chronic obstipation                                                                                                                      | urinary and fecal incontinence<br>pathological autonomous stress response<br>hyperhidrosis<br>facial dyscoloration                                                                                                          | N/A                                                                                                           | -                                                                                                                                                                | -                                                                                                                                                                                                |
| <b>Ocular symptoms</b>                 | -                                                                                                                                                                                                                                                             | -                                                                                                                                                                                                               | bilateral optic nerve atrophy                                                                                                                                                                                                                         | -                                                                                                                                                                                                                           | -                                                                                                                                                                                                                           | N/A                                                                                                           | bilateral optic atrophy                                                                                                                                          | -                                                                                                                                                                                                |
| <b>Skeletal symptoms</b>               | bilateral hip luxation<br>neuromuscular scoliosis                                                                                                                                                                                                             | bilateral hip luxation                                                                                                                                                                                          | thoracolumbar scoliosis<br>pes equinus                                                                                                                                                                                                                | severe thoracolumbar scoliosis<br>bilateral hip luxation<br>osteopenia<br>multiple pathological fractures<br>ulnar deviation                                                                                                | thoracolumbar scoliosis<br>hip luxation (right)<br>osteopenia<br>congenital radial head dislocation (right)<br>recurring pathological fractures<br>ulnar deviation                                                          | bilateral hip luxation                                                                                        | thoracolumbar kypho-scoliosis<br>bilateral hip subluxation<br>multiple femoral head fractures                                                                    | -                                                                                                                                                                                                |
| <b>Dysmorphic features</b>             | low set, posteriorly rotated ears<br>overlapping toes                                                                                                                                                                                                         | broad nasal bridge                                                                                                                                                                                              |                                                                                                                                                                                                                                                       | low set ears<br>overlapping toes                                                                                                                                                                                            | low set ears<br>overlapping toes<br>arched palate                                                                                                                                                                           | low set ears<br>overlapping toes                                                                              |                                                                                                                                                                  | simplified outer helix of the right ear<br>hydrocephalus                                                                                                                                         |
| <b>Miscellaneous symptoms</b>          |                                                                                                                                                                                                                                                               |                                                                                                                                                                                                                 |                                                                                                                                                                                                                                                       |                                                                                                                                                                                                                             |                                                                                                                                                                                                                             |                                                                                                               |                                                                                                                                                                  |                                                                                                                                                                                                  |

<sup>†</sup> Park et al. 2018; <sup>‡</sup> Andersen et al. 2019

\*+/-: positive / present; -/-: negative / not achieved; N/A: not available

#### IV. Supplementary Table 3 – Clinical Chemistry analysis

|        | N                                                                                                                                                                    | C112X <sup>Hom</sup>                     | C112X <sup>Het</sup> | P-value <sup>1</sup> |
|--------|----------------------------------------------------------------------------------------------------------------------------------------------------------------------|------------------------------------------|----------------------|----------------------|
|        |                                                                                                                                                                      | Statistics presented: n/N (%); Mean (SD) |                      |                      |
| Sex    |                                                                                                                                                                      | 5                                        |                      | 12                   |
| Female |                                                                                                                                                                      | 3 / 5 (60 %)                             | 7 / 12 (58 %)        |                      |
| Male   |                                                                                                                                                                      | 2 / 5 (40 %)                             | 5 / 12 (42 %)        |                      |
| Liver  | <b>P-ASAT</b><br>µkat/L<br><br><i>Reference:</i><br>1-5 y: < 0.93<br>5-9 y: < 0.8<br>9-18y: < 0.72<br>Adult F: < 0.6<br>Adult M: < 0.75                              | 0.55 (0.17)                              | 0.46 (0.12)          | 0.23                 |
|        | <b>P-ALAT</b><br>µkat/L<br><br><i>Reference:</i><br>F 6m – 9y: < 0.39<br>M 6m – 9y: < 0.29<br>9 – 18y: < 0.51<br>Adult F: < 0.75<br>Adult M: < 1.1                   | 0.62 (0.48)                              | 0.46 (0.37)          | 0.57                 |
|        | <b>P-GGT</b><br>µkat/L<br><br><i>Reference:</i><br>6 m – 8 y: < 0.3<br>8 – 13 y: < 0.4<br>13 – 18 y: < 0.6<br>Adult Female: < 0.75<br>Adult Male: < 1.3              | 0.22 (0.06)                              | 0.4 (0.28)           | 0.06                 |
|        | <b>P-ALP</b><br>µkat/L<br><br><i>Reference:</i><br>2 – 8 y: 2.0 – 5.0<br>9 – 14 y: 1.4 – 8.7<br>F 15 – 17 y: 0.7 – 4.0<br>M 15 – 17 y: 1.2 – 5.6<br>Adult: 0.7 – 1.9 | 2.45 (0.68)                              | 2.16 (1.83)          | 0.33                 |
|        | <b>P-Total bilirubin</b><br>µmol/l<br><br><i>Reference:</i><br>6 m – 7 y: < 8<br>8 – 12 y: < 14<br>13 – 18 y: < 30<br>Adult: < 25                                    | 17.6 (12.8) <sup>2</sup>                 | 8.4 (4.0)            | 0.06                 |
|        | <b>P-Conjugated bilirubin</b><br>µmol/L<br><br><i>Reference:</i><br>0 m – 8 y: < 4<br>8 – 13 y: < 6<br>13 – 18 y: < 12<br>Adult: < 5                                 | 3.08 (1.91)                              | 1.49 (0.98)          | 0.07                 |
|        | <b>P-Ammonia</b><br>µmol/L<br><br><i>Reference:</i><br>F: < 51<br>M: < 60                                                                                            | 35 (22.86)                               | 26.92 (7.92)         | >0.9                 |
|        | <b>P-Bile acids</b><br>µmol/L<br><br><i>Reference:</i><br>< 10                                                                                                       | 4.08 (4.13)                              | 4.4 (2.06)           | 0.44                 |
|        | <b>P-Albumin</b><br>g/L<br><br><i>Reference:</i><br>4 d – 12 y: 38-47<br>12 – 18 y: 41-50<br>Adult: 36 – 48                                                          | 43.2 (3.7)                               | 43.9 (5.0)           | 0.52                 |

|        |                                                                                                                                                                                                                                                                                       |                                                                                                  |             |        |
|--------|---------------------------------------------------------------------------------------------------------------------------------------------------------------------------------------------------------------------------------------------------------------------------------------|--------------------------------------------------------------------------------------------------|-------------|--------|
| Lipids | <b>P-Triglycerides</b><br>mmol/L<br><br><i>Reference:</i><br>6 m – 18 y: < 2.9<br>Adult: < 2.6                                                                                                                                                                                        | 1.07 (0.7)                                                                                       | 1.86 (1.3)  | 0.1    |
|        | <b>P-Cholesterol</b><br>mmol/L<br><br><i>Reference:</i><br>F 6 m – 3 y: 1.9 – 5.1<br>M 6 m – 3 y: 2.8 – 5.7<br>F 3 – 18 y: 3.2 – 6.1<br>M 3 – 18 y: 2.9 – 6.0<br>19 – 30 y: 2.9 – 6.1<br>31 – 50 y: 3.3 – 6.9                                                                         | 4.05 (0.44)                                                                                      | 4.57 (1.23) | 0.65   |
|        | <b>P-APO A</b><br>g/L<br><br><i>Reference:</i><br>F: 1.1 – 2.3<br>M: 1.0 – 2.1                                                                                                                                                                                                        | 1.57 (0.34)                                                                                      | 1.54 (0.29) | 0.88   |
|        | <b>P-APO B</b><br>g/L<br><br><i>Reference:</i><br>0.66 – 1.67                                                                                                                                                                                                                         | 0.72 (0.12)                                                                                      | 0.91 (0.33) | 0.38   |
|        | <b>P-Cystatin C</b><br>mg/L<br><br><i>Reference:</i><br>1 – 49 y: 0.6 – 1.1                                                                                                                                                                                                           | 0.78 (0.15)                                                                                      | 0.84 (0.11) | 0.27   |
| Kidney | <b>P-Creatinine</b><br>μmol/L<br><br><i>Reference:</i><br>6 m – 2 y: 18 – 48<br>2 – 6 y: 22 – 53<br>F 6 – 11 y: 31– 70<br>M 6 – 11 y: 31 – 76<br>F 11 – 15 y: 36–70<br>M 11 – 15 y: 44 – 90<br>F 15 – 18 y: 49 – 86<br>M 15 – 18 y: 55 – 106<br>Adult F: 45 – 90<br>Adult M: 60 – 105 | 25 (6)                                                                                           | 56 (15)     | <0.001 |
|        | <b>P-Urea</b><br>mmol/L<br><br><i>Reference:</i><br>1 – 10 y: 3.1 – 7.8<br>11 – 18 y: 2.7 – 7.1<br>Adult F: 2.6 – 6.4<br>Adult M: 3.2 – 8.1                                                                                                                                           | 4.06 (1.53)                                                                                      | 4.75 (1.3)  | 0.44   |
|        | <b>P-Urate</b><br>μmol/L<br><br><i>Reference:</i><br>6 m – 9y: 160 – 350<br>9 – 13 y: 130 – 350<br>F 13 – 18 y: 110 – 340<br>M 13 – 18 y: 170 – 470<br>Adult F: 155 – 350<br>Adult M: 230 – 480                                                                                       | 152 (38)                                                                                         | 237 (84)    | 0.05   |
|        | <b>U-Albumin/creatinine ratio</b><br><br><i>Reference:</i><br>1 – 5 y: < 3.3<br>6 – 10 y: < 2.7<br>11 – 15 y: < 2.1<br>> 16 y: < 3.0                                                                                                                                                  | 1.65 (1.52)                                                                                      | 1.00 (1.37) | 0.23   |
|        | <b>U-α1-microglobulin/creatinine ratio</b><br><br><i>Reference:</i><br>< 0.7 g/mol                                                                                                                                                                                                    | Low or below the limit of detection, indicating normal protein reabsorption in the prox. tubules |             | -      |
|        |                                                                                                                                                                                                                                                                                       |                                                                                                  |             |        |

|                 |                                                                                                                                                                                                                                                                                              |              |               |       |
|-----------------|----------------------------------------------------------------------------------------------------------------------------------------------------------------------------------------------------------------------------------------------------------------------------------------------|--------------|---------------|-------|
| Electrolytes    | <b>P-Na<sup>+</sup></b><br>mmol/L<br><br><i>Reference:</i><br><i>137-145</i>                                                                                                                                                                                                                 | 138.38 (1.2) | 137.88 (1.67) | 0.56  |
|                 | <b>P-K<sup>+</sup></b><br>mmol/L<br><br><i>Reference:</i><br><i>1 - 18 y: 3.7 - 4.8</i><br><i>&gt; 18 y: 3.5 - 4.4</i>                                                                                                                                                                       | 4.22 (0.54)  | 4.38 (0.42)   | 0.57  |
|                 | <b>P-Cl<sup>-</sup></b><br>mmol/L<br><br><i>Reference:</i><br><i>0 - 18 y: 103 - 111</i><br><i>Adult: 100 - 110</i>                                                                                                                                                                          | 103.9 (2.47) | 10.273 (1.86) | 0.4   |
|                 | <b>P-Mg<sup>2+</sup></b><br>mmol/L<br><br><i>Reference:</i><br><i>0 - 18 y: 0.76 - 1.0</i><br><i>Adult: 0.7 - 0.95</i>                                                                                                                                                                       | 0.87 (0.07)  | 0.86 (0.05)   | 0.72  |
|                 | <b>P-Ca<sup>2+</sup></b><br>mmol/L<br><br><i>Reference:</i><br><i>1 - 18 y: 2.32 - 2.67</i><br><i>Adult: 2.15 - 2.5</i>                                                                                                                                                                      | 2.46 (0.17)  | 2.4 (0.08)    | 0.56  |
|                 | <b>P-PO<sub>4</sub></b><br>mmol/L<br><br><i>Reference:</i><br><i>1 - 7 y: 1.35 - 2.03</i><br><i>F 8 - 12 y: 1.11 - 1.83</i><br><i>M 8 - 12 y: 1.28 - 1.99</i><br><i>F 13 - 18 y: 0.94 - 1.63</i><br><i>M 13 - 18 y: 0.94 - 1.8</i><br><i>Adult F: 0.8 - 1.5</i><br><i>Adult M: 0.7 - 1.6</i> | 1.7 (0.23)   | 1.2 (0.08)    | 0.004 |
| Adrenal gland   | <b>P-ACTH</b><br>pmol/L<br><br><i>Reference:</i><br><i>01.05.14</i>                                                                                                                                                                                                                          | 4.4 (7.0)    | 5.4 (5.5)     | 0.05  |
|                 | <b>P-Cortisol</b><br>nmol/L<br><br><i>Reference:</i><br><i>135 - 540</i>                                                                                                                                                                                                                     | 251 (162)    | 271 (149)     | 0.88  |
| Heart           | <b>P-Troponin T (hs)</b><br>ng/L<br><br><i>Reference:</i><br><i>&lt; 15</i>                                                                                                                                                                                                                  | 5.33 (0.53)  | 4.69 (1.9)    | 0.13  |
|                 | <b>P-NTproBNP</b><br>ng/L<br><br><i>Reference:</i><br><i>F: &lt; 150</i><br><i>M: &lt; 100</i>                                                                                                                                                                                               | 56 (41)      | 50 (61)       | 0.38  |
| Skeletal muscle | <b>P-CK</b><br>μkat/L<br><br><i>Reference:</i><br><i>0 - 2 y: &lt; 3.8</i><br><i>2 - 10 y: &lt; 3.8</i><br><i>10 - 14 y: &lt; 6.6</i><br><i>14 - 18 y: &lt; 9.0</i><br><i>Adult M: &lt; 6.7</i><br><i>Adult F: &lt; 3.5</i>                                                                  | 1.55 (1.15)  | 2.33 (1.28)   | 0.28  |

|                                |                                                                                                                                                     |              |              |        |
|--------------------------------|-----------------------------------------------------------------------------------------------------------------------------------------------------|--------------|--------------|--------|
| Thyroid gland                  | <b>P-TSH</b><br>mIU/L<br><i>Reference:</i><br>0.27 – 4.2                                                                                            | 1.68 (1.04)  | 2.56 (1.09)  | 0.23   |
|                                | <b>P-FT3</b><br>pmol/L<br><i>Reference:</i><br>< 6.8                                                                                                | 5.78 (1.08)  | 5.14 (1.23)  | 0.23   |
|                                | <b>P-FT4</b><br>pmol/L<br><i>Reference:</i><br>12 – 22                                                                                              | 18.84 (1.19) | 14.07 (2.08) | <0.001 |
| Parathyroid gland & bone metab | <b>P-PTH</b><br>pmol/L<br><i>Reference:</i><br>1.6 – 6.9                                                                                            | 3.4 (1.6)    | 7.7 (7.0)    | 0.06   |
| Pancreas                       | <b>P-Amylase</b><br>µkat/L<br><i>Reference:</i><br>2 - 15 y: 0.1 – 0.6<br>15 – 18 y: 0.16 – 0.8<br>Adult: 0.15 – 1.1                                | 0.27 (0.11)  | 0.38 (0.17)  | 0.23   |
|                                | <b>P-Insulin</b><br>mIU/L<br><i>Reference:</i><br>2.6 – 24.9                                                                                        | 6 (2)        | 17 (15)      | 0.001  |
|                                | <b>P-C-peptide</b><br>nmol/L<br><i>Reference:</i><br>0.37 – 1.47                                                                                    | 0.49 (0.05)  | 1.06 (0.44)  | <0.001 |
|                                | <b>P-Fructosamine</b><br>µmol/L<br><i>Reference:</i><br>160-340                                                                                     | 301.5 (56.2) | 288.8 (38.1) | 0.91   |
|                                | <b>B-HbA1c</b> mmol/mol<br><i>Reference:</i><br>< 50 y: 27 – 42<br>> 50 y: 31 – 46                                                                  | 16.4 (2.4)   | 33.2 (3.4)   | <0.001 |
| Iron metabolism                | <b>P-Ferritin</b><br>µg/L<br><i>Reference:</i><br>5 m – 14 y: 15 – 200<br>F 15 – 50 y: 15 – 150<br>M > 14 y: 30 – 400<br>F > 50 y: 30 - 400         | 165 (290)    | 104 (112)    | >0.9   |
|                                | <b>P-Iron</b><br>µmol/L<br><i>Reference:</i><br>1 – 14 y: 9 – 22<br>> 14 y: 9 – 34                                                                  | 11.2 (3.9)   | 13.1 (4.3)   | 0.56   |
|                                | <b>P-Transferrin</b><br>g/L<br><i>Reference:</i><br>6 m – 12 y: 2.1 – 3.5<br>F 12 – 18 y: 2.4 – 4.3<br>M 12 – 18 y: 2.4 – 3.8<br>Adult: 1.87 – 3.19 | 2.67 (0.46)  | 3.09 (0.54)  | 0.23   |
| Vitamins                       | <b>P-Folate</b><br>nmol/L<br><i>Reference:</i><br>7 – 39                                                                                            | 21 (16)      | 22 (10)      | 0.52   |
|                                | <b>P-Vitamin B<sub>12</sub></b><br>pmol/L<br><i>Reference:</i><br>145 – 569                                                                         | 475 (170)    | 264 (67)     | 0.006  |

|                                                                                         |                                                                                                                                                                                                                                                                                                                                                                                                                                                       |             |              |      |
|-----------------------------------------------------------------------------------------|-------------------------------------------------------------------------------------------------------------------------------------------------------------------------------------------------------------------------------------------------------------------------------------------------------------------------------------------------------------------------------------------------------------------------------------------------------|-------------|--------------|------|
| Immune system & inflammation                                                            | <b>P-IgG</b><br>g/L<br><br><i>Reference:</i><br>2 – 3 y: 3.7 – 11.8<br>3 – 4 y: 4.5 – 12.8<br>4 – 5 y: 5.1 – 13.7<br>5 – 6 y: 5.6 – 14.3<br>6 – 7 y: 6.0 – 14.7<br>7 – 8 y: 6.3 – 15.0<br>8 – 9 y: 6.5 – 15.1<br>9 – 10 y: 6.6 – 15.2<br>10 – 11 y: 6.6 – 15.3<br>11 – 12 y: 6.7 – 15.3<br>12 – 13 y: 6.7 – 15.5<br>13 – 14 y: 6.8 – 15.7<br>> 14 y: 6.7 – 14.5                                                                                       | 9.79 (1.52) | 12.42 (2.26) | 0.02 |
|                                                                                         | <b>P-IgA</b><br>g/L<br><br><i>Reference:</i><br>2 – 3 y: 0.1 – 1.3<br>3 – 4 y: 0.2 – 1.6<br>4 – 5 y: 0.3 – 1.9<br>5 – 6 y: 0.3 – 2.1<br>6 – 7 y: 0.4 – 2.2<br>7 – 8 y: 0.4 – 2.4<br>8 – 10 y: 0.4 – 2.5<br>10 – 11 y: 0.3 – 2.6<br>11 – 13 y: 0.3 – 2.7<br>13 – 14 y: 0.2 – 2.8<br>> 14 y: 0.9 – 4.5                                                                                                                                                  | 1.51 (0.61) | 1.69 (0.82)  | 0.88 |
|                                                                                         | <b>P-IgM</b><br>g/L<br><br><i>Reference:</i><br>F 2 – 3 y: 0.3 – 2.1<br>M 2 – 3 y: 0.3 – 1.8<br>F 3 – 5 y: 0.4 – 2.2<br>M 3 – 5 y: 0.3 – 1.9<br>F 6 – 7 y: 0.5 – 2.4<br>M 6 – 7 y: 0.4 – 2.0<br>F 7 – 9 y: 0.5 – 2.5<br>M 7 – 9 y: 0.4 – 2.0<br>F 9 – 10 y: 0.6 – 2.6<br>M 9 – 12 y: 0.4 – 2.1<br>F 10 – 11 y: 0.6 – 2.7<br>F 11 – 12 y: 0.6 – 2.8<br>F 12 – 13 y: 0.7 – 2.9<br>M 12 – 14 y: 0.5 – 2.2<br>F 13 – 14 y: 0.7 – 3.0<br>> 14 y: 0.3 – 2.1 | 0.91 (0.26) | 0.96 (0.5)   | >0.9 |
|                                                                                         | <b>P-CRP</b><br>mg/L<br><br><i>Reference:</i><br>< 3                                                                                                                                                                                                                                                                                                                                                                                                  | 0.6 (0.33)  | 1.04 (0.87)  | 0.38 |
|                                                                                         | <b>P-Haptoglobin</b><br>g/L<br><br><i>Reference:</i><br>0 – 6 y: 0.1 – 1.0<br>F 6 – 10: 0.15 – 1.2<br>M 6 – 10: 0.1 – 1.0<br>F 10 – 12: 0.1 – 1.35<br>M 10 – 14: 0.1 – 1.2<br>F 12 – 14: 0.1 – 1.1<br>F 14 – 16: 0.15 – 1.25<br>M 14 – 16: 0.2 – 1.5<br>Adult: 0.24 – 1.9                                                                                                                                                                             | 0.56 (0.28) | 0.87 (0.36)  | 0.13 |
|                                                                                         | <sup>1</sup> Comparison of C112X <sup>Hem</sup> with C112X <sup>Het</sup> using Mann-Whitney U test<br><br><sup>2</sup> Patient 4 showed elevated bilirubin levels without any additional signs of liver damage and consistent with variants of bilirubin metabolism such as Gilbert's syndrome. The mean bilirubin level of C112X <sup>Hem</sup> individuals excluding patient 4 is 12.0 ± 1.7 μmol/L                                                |             |              |      |
| P – plasma, U – urine, B – whole blood<br>F – female, M – male, m – months, y – year(s) |                                                                                                                                                                                                                                                                                                                                                                                                                                                       |             |              |      |



## V. Supplementary Table 4. Complete blood counts

### Patient 1

| Age      | Erc count (x 10 <sup>6</sup> /μl) | MCV fl              | Hkt %               | Hb (g/L)         | Reti (rel., %) | Reti (abs., x 10 <sup>3</sup> /μl) | Reti He (pg)         | RPI        | Neutrophils (x 10 <sup>3</sup> /μl) | Lymphocytes (x 10 <sup>3</sup> /μl) | Monocytes (x 10 <sup>3</sup> /μl) | Eosinophils (x 10 <sup>3</sup> /μl) | Basophils (x 10 <sup>3</sup> /μl) | Mean Platelet volume (fL) | Immature granulocytes (x 10 <sup>3</sup> /μl) |
|----------|-----------------------------------|---------------------|---------------------|------------------|----------------|------------------------------------|----------------------|------------|-------------------------------------|-------------------------------------|-----------------------------------|-------------------------------------|-----------------------------------|---------------------------|-----------------------------------------------|
| 8y2m     | 3.39<br>(3.96-5.03)               | 97.1<br>(74.4-86.1) | 32.9<br>(32.2-39.8) | 111<br>(107-134) | 1.8<br>(1-1.9) | 60<br>(42-70)                      | 37 pg<br>(23.6-33.9) | 0.9<br>2-3 | 5.31<br>(4.31-11)                   | 217<br>(206-369)                    | 3.94<br>(1.63-7.75)               | 0.99<br>(0.97-3.96)                 | 0.01<br>(0.01-0.06)               | 13.0<br>(9.2-11.4)        | 0.03<br>(<0.04)                               |
| 7y3m     | 3.68<br>(3.96-5.03)               | 86.7<br>(74.4-86.1) | 31.9<br>(32.2-39.8) | 108<br>(107-134) | NA             | NA                                 | NA                   | NA         | 5.93<br>(4.31-11)                   | 187<br>(206-369)                    | 3.2<br>(1.63-7.75)                | 1.99<br>(0.97-3.96)                 | 0.02<br>(0.01-0.06)               | 12.2<br>(9.2-11.4)        | 0.01<br>(<0.04)                               |
| 7y0m     | 3.72<br>(3.96-5.03)               | 90.3<br>(74.4-86.1) | 33.6<br>(32.2-39.8) | 109<br>(107-134) | NA             | NA                                 | NA                   | NA         | 7.30<br>(4.31-11)                   | 219<br>(206-369)                    | NA                                | NA                                  | NA                                | NA                        | NA                                            |
| 6y10m    | 3.71<br>(3.96-5.03)               | 88.9<br>(74.4-86.1) | 33.0<br>(32.2-39.8) | 107<br>(107-134) | NA             | NA                                 | NA                   | NA         | 5.86<br>(4.31-11)                   | 227<br>(206-369)                    | 2.93<br>(1.63-7.75)               | 2.18<br>(0.97-3.96)                 | 0.01<br>(0.01-0.06)               | 12.3<br>(9.2-11.4)        | 0.01<br>(<0.04)                               |
| 6y9m     | 3.62<br>(3.96-5.03)               | 89.5<br>(74.4-86.1) | 32.4<br>(32.2-39.8) | 107<br>(107-134) | 1<br>(1-1.9)   | 37.3<br>(42-70)                    | 33.1<br>(23.6-33.9)  | 0.5        | 6.23<br>(4.31-11)                   | 213<br>(206-369)                    | 3.2<br>(1.63-7.75)                | 2.3<br>(0.97-3.96)                  | 0.01<br>(0.01-0.06)               | 12.2<br>(9.2-11.4)        | 0.01<br>(<0.04)                               |
| 6y1m     | 3.59<br>(3.96-5.03)               | 91.4<br>(74.4-86.1) | 32.8<br>(32.2-39.8) | 108<br>(107-134) | NA             | NA                                 | NA                   | NA         | 5.30<br>(4.31-11)                   | 218<br>(206-369)                    | NA                                | NA                                  | NA                                | NA                        | NA                                            |
| 5y11m17d | 3.56<br>(3.89-4.97)               | 90.4<br>(71.3-84)   | 32.2<br>(31-37.7)   | 106<br>(102-127) | NA             | NA                                 | NA                   | NA         | 4.40<br>(5.14-13.8)                 | 197<br>(202-403)                    | NA                                | NA                                  | NA                                | NA                        | NA                                            |
| 5y11m11d | 3.67<br>(3.89-4.97)               | 85.5<br>(71.3-84)   | 31.5<br>(31-37.7)   | 107<br>(102-127) | NA             | NA                                 | NA                   | NA         | 5.06<br>(5.14-13.8)                 | 198<br>(202-403)                    | 3.27<br>(1.54-7.92)               | 1.39<br>(1.13-5.2)                  | 0.02<br>(0.01-0.06)               | 12.1<br>(9-10.9)          | 0.01<br>(<0.06)                               |
| 3y10m    | 3.86<br>(3.89-4.97)               | 88.6<br>(71.3-84)   | 34.2<br>(31-37.7)   | 112<br>(102-127) | NA             | NA                                 | NA                   | NA         | 7.34<br>(5.14-13.8)                 | 322<br>(202-403)                    | 2.4<br>(1.54-7.92)                | 3.81<br>(1.13-5.2)                  | 0.03<br>(0.01-0.06)               | 11.7<br>(9-10.9)          | 0.02<br>(<0.06)                               |

## Patient 2

| Age                | Erc count (x 10 <sup>9</sup> /μL) | MCV fL    | Hkt % | Hb g/L  | Reti (rel., %) | Reti (abs., x 10 <sup>9</sup> /L) | RPI | Leukocytes (x 10 <sup>9</sup> /L) | Thrombocytes (x 10 <sup>9</sup> /L) | Neutrophils (x 10 <sup>9</sup> /L) | Lymphocytes (x 10 <sup>9</sup> /L) | Monocytes (x 10 <sup>9</sup> /L) | Eosinophils (x 10 <sup>9</sup> /L) | Basophils (x 10 <sup>9</sup> /L) |
|--------------------|-----------------------------------|-----------|-------|---------|----------------|-----------------------------------|-----|-----------------------------------|-------------------------------------|------------------------------------|------------------------------------|----------------------------------|------------------------------------|----------------------------------|
| 4y0m               | 4.05                              | 83        | 33.5  | 107     | 1.7            | 67                                | NA  | 6.1                               | 327                                 | 2.64                               | 2.65                               | 0.34                             | 0.31                               | <0.1                             |
| 2y7m               | 4.44                              | 79        | 34.9  | 113     | NA             | NA                                | NA  | 10.2                              | 398                                 | 3.81                               | 4.51                               | 0.72                             | 0.49                               | 0.12                             |
| 2y5m               | 4.4                               | 79        | 34.8  | 109     | 3.2            | 141                               | 1.7 | 9.5                               | 447                                 | 3.35                               | 5.23                               | 0.54                             | 0.36                               | <0.1                             |
| 2y4m               | 4.28                              | 77        | 33    | 11      | NA             | NA                                | NA  | 13.6                              | 436                                 | 5.31                               | 6.46                               | 0.76                             | 0.4                                | 0.1                              |
| 1y11m              | 4.11                              | 75        | 30.8  | 98      | NA             | NA                                | NA  | 4.7                               | 368                                 | 1.98                               | 2.05                               | 0.28                             | 0.23                               | <0.1                             |
| 1y4m15d            | 4.08                              | 81.7      | 33.3  | 100     | NA             | NA                                | NA  | 9.8                               | 689                                 | NA                                 | NA                                 | NA                               | NA                                 | NA                               |
| 1y4m2d             | 3.6                               | 80.7      | 29.1  | 106     | 1.4            | 51                                | 0.5 | 7.5                               | 249                                 | 3.42                               | 3.07                               | 0.62                             | <0.1                               | <0.1                             |
| 0y9m               | 4.09                              | 86.8      | 35.5  | 111     | NA             | NA                                | NA  | 13.9                              | 496                                 | 3.71                               | 8.28                               | 0.98                             | 0.37                               | <0.1                             |
| reference interval | 3.1-5.3                           | 70.0-86.0 | 30-43 | 101-131 | 0.5-2.0        | 25-100                            | <2  | (6.0-17.5)                        | 150-500                             | 1.5-8.7                            | 3.5-14.5                           | 0-1.2                            | 0-0.7                              | 0-0.1                            |

## Patient 3

| Age                | Erc count (x 10 <sup>12</sup> /L) | MCV fL | Hkt %     | Hb g/L  | Reti (rel., %) | Reti (abs., x 10 <sup>9</sup> /μL) | RPI | Leukocytes (x 10 <sup>9</sup> /L) | Thrombocytes (x 10 <sup>9</sup> /L) | Neutrophils (x 10 <sup>9</sup> /L) | Lymphocytes (x 10 <sup>9</sup> /L) | Monocytes (x 10 <sup>9</sup> /L) | Eosinophils (x 10 <sup>9</sup> /L) | Basophils (x 10 <sup>9</sup> /L) |
|--------------------|-----------------------------------|--------|-----------|---------|----------------|------------------------------------|-----|-----------------------------------|-------------------------------------|------------------------------------|------------------------------------|----------------------------------|------------------------------------|----------------------------------|
| 4y6m               | 3.5                               | 97     | 34        | 103     | NA             | NA                                 | NA  | 6.4                               | 312                                 | 4.09                               | 1.81                               | 0.4                              | 0.11                               | 0.01                             |
| reference interval | 3.85-5.15                         | 73-91  | 32.5-41.5 | 107-139 |                |                                    |     | 5.4-13.8                          | 200-460                             | 1.5-8.5                            | 2.2-8.5                            | 0.1-1.1                          | 0.02-0.75                          | 0-0.2                            |

## Patient 4

| Age                | Erc count (x 10 <sup>9</sup> /μL) | MCV (fL)  | Hkt (%)   | Hb (g/L) | Reti (rel., %) | Reti (abs., x 10 <sup>9</sup> /μL) | Reti He (pg) | RPI   | Leukocytes (x 10 <sup>9</sup> /μL) | Thrombocytes (x 10 <sup>9</sup> /μL) | Neutrophils (x 10 <sup>9</sup> /μL) | Lymphocytes (x 10 <sup>9</sup> /μL) | Monocytes (x 10 <sup>9</sup> /μL) | Eosinophils (x 10 <sup>9</sup> /μL) | Basophils (x 10 <sup>9</sup> /μL) | Mean Platelet volume (fL) | Immature granulocytes (x 10 <sup>9</sup> /μL) |
|--------------------|-----------------------------------|-----------|-----------|----------|----------------|------------------------------------|--------------|-------|------------------------------------|--------------------------------------|-------------------------------------|-------------------------------------|-----------------------------------|-------------------------------------|-----------------------------------|---------------------------|-----------------------------------------------|
| 13y9m              | 2.66                              | 93.2      | 24.8      | 88       | 3.1            | 82.7                               | 35.5         | 0.9   | 4.69                               | 136                                  | 2.79                                | 1.54                                | 0.22                              | 0.09                                | 0.05                              | 12.6                      | 0.01                                          |
| reference interval | 3.93-4.9                          | 76.9-90.6 | 33.4-40.4 | 108-133  | 0.9-1.5        | 42-65                              | 28.2-33.9    | 44622 | 4.19-9.43                          | 194-345                              | 1.82-7.47                           | 1.16-3.33                           | 0.19-0.72                         | 0.02-0.32                           | 0.01-0.05                         | 9.6-11.7                  | <0.03                                         |

## Patient 5

| Age             | Erc count (x 10 <sup>6</sup> /μL) | MCV fL | Hkt (%)     | Hb (g/L)  | Reti (rel., %) | Reti (abs., x 10 <sup>3</sup> Tsd/μL) | Reti He (pg) | RPI |
|-----------------|-----------------------------------|--------|-------------|-----------|----------------|---------------------------------------|--------------|-----|
| 10y9m           | NA                                | NA     | 32.9        | 107       | NA             | NA                                    | NA           | NA  |
| reference range |                                   |        | (32.2-39.8) | (107-134) |                |                                       |              |     |

## Patient 6

| Age                          | Erc count (x 10 <sup>6</sup> /μL) | MCV fL | Hkt (%) | Hb (g/L) | Reti (rel., %) | Reti (abs., x 10 <sup>3</sup> Tsd/μL) | Reti He (pg) | RPI |
|------------------------------|-----------------------------------|--------|---------|----------|----------------|---------------------------------------|--------------|-----|
| no hematology data available |                                   |        |         |          |                |                                       |              |     |

## Patient 7

| Age             | Erc count (x 10 <sup>6</sup> /μL) | MCV (fL) | Hkt (%) | Hb (g/L) | Reti (rel., %) | Reti (abs., x 10 <sup>3</sup> /μL) | Reti He (pg) | RPI | Leukocytes (x 10 <sup>3</sup> /μL) | Thrombocytes (x 10 <sup>3</sup> /μL) | Neutrophils (x 10 <sup>3</sup> /μL) | Lymphocytes (x 10 <sup>3</sup> /μL) | Monocytes (x 10 <sup>3</sup> /μL) | Eosinophils (x 10 <sup>3</sup> /μL) | Basophils (x 10 <sup>3</sup> /μL) | Mean Platelet volume (fL) | Immature granulocytes (x 10 <sup>3</sup> /μL) |
|-----------------|-----------------------------------|----------|---------|----------|----------------|------------------------------------|--------------|-----|------------------------------------|--------------------------------------|-------------------------------------|-------------------------------------|-----------------------------------|-------------------------------------|-----------------------------------|---------------------------|-----------------------------------------------|
| 9y11m           | 3.73                              | 95       | 36      | 109      | NA             | NA                                 | NA           | NA  | 5.01                               | 223                                  | 2.4                                 | 2.05                                | 0.39                              | 0.14                                | 0.03                              | 12.6                      | 0.01                                          |
| 9y6m            | 3.82                              | 97       | 37      | 115      | NA             | NA                                 | NA           | NA  | 11.66                              | 235                                  | 10.85                               | 0.38                                | 0.4                               | 0.15                                | 0.03                              | 11.7                      | 0.05                                          |
| 9y5m            | 3.32                              | 94       | 31      | 100      | NA             | NA                                 | NA           | NA  | 6.13                               | 208                                  | 3.98                                | 1.51                                | 0.45                              | 0.17                                | 0.04                              | 11.8                      | 0.03                                          |
| 9y4m            | 3.79                              | 95       | 36      | 114      | NA             | NA                                 | NA           | NA  | 4.48                               | 221                                  | 2.08                                | 1.84                                | 0.35                              | 0.15                                | 0.04                              | 12.4                      | 0.01                                          |
| 8y11m           | 3.42                              | 94       | 32      | 104      | NA             | NA                                 | NA           | NA  | 5.52                               | 341                                  | 2.81                                | 2.31                                | 0.25                              |                                     |                                   | 11.8                      | 0                                             |
| reference range | 4.2-5.6                           | 75-90    | 35-43   | 115-145  |                |                                    |              |     | 4.3-12.0                           | 150-425                              | 1.5-7.0                             | 1.4-4.5                             | 0.3-0.9                           | 0.0-0.9                             | 0.0-0.1                           | 8.5-12.0                  | 0.00-0.06                                     |

## Patient 8

| Age             | Erc count (x 10 <sup>6</sup> /μL) | MCV (fL) | Hkt (%) | Hb (g/L) | Reti (rel., %) | Reti (abs., x 10 <sup>3</sup> /μL) | Reti He (pg) | RPI | Leukocytes (x 10 <sup>3</sup> /μL) | Thrombocytes (x 10 <sup>3</sup> /μL) | Neutrophils (x 10 <sup>3</sup> /μL) | Lymphocytes (x 10 <sup>3</sup> /μL) | Monocytes (x 10 <sup>3</sup> /μL) | Eosinophils (x 10 <sup>3</sup> /μL) | Basophils (x 10 <sup>3</sup> /μL) | Mean Platelet volume (fL) | Immature granulocytes (x 10 <sup>3</sup> /μL) |
|-----------------|-----------------------------------|----------|---------|----------|----------------|------------------------------------|--------------|-----|------------------------------------|--------------------------------------|-------------------------------------|-------------------------------------|-----------------------------------|-------------------------------------|-----------------------------------|---------------------------|-----------------------------------------------|
| 2y9m            | 3.64                              | 85       | 31      | 92       | NA             | NA                                 | NA           | NA  | 4.3                                | 311                                  | 1.6                                 | 2                                   | 0.3                               | 0.2                                 | 0                                 | 9.7                       | 0.01                                          |
| 2y5m28d         | 2.96                              | 82       | 24      | 76       | NA             | NA                                 | NA           | NA  | 6.07                               | 327                                  | 4.31                                | 1.26                                | 0.35                              | 0.12                                | 0.03                              | 10.4                      | 0.01                                          |
| 2y5m26d         | 3.36                              | 82       | 28      | 84       | NA             | NA                                 | NA           | NA  | 4.38                               | 300                                  | 1.38                                | 2.39                                | 0.29                              | 0.29                                | 0.03                              | 9.7                       | 0                                             |
| 2y2m            | 3.26                              | 86       | 28      | 89       | NA             | NA                                 | NA           | NA  | 3.97                               | 287                                  | 1.47                                | 1.94                                | 0.27                              | 0.26                                | 0.03                              | 10.1                      | 0.1                                           |
| 2y0m            | 3.74                              | 83       | 31      | 102      | NA             | NA                                 | NA           | NA  | 6.3                                | 271                                  | 2.7                                 | 2.9                                 | 0.3                               | 0.3                                 | 0.1                               | NA                        |                                               |
| reference range | 4.0-5.4                           | 70-86    | 32-41   | 105-140  |                |                                    |              |     | 5.0-15.0                           | 150-500                              | 1.0-7.0                             | 2.0-8.0                             | 0.3-1.3                           | <1.0                                | <0.3                              | 8.0-12.0                  | 0.00-0.6                                      |

### Father Patient 1 (heterozygous)

| Age             | Erc count (x 10 <sup>6</sup> /μl) | MCV fl    | Hkt %   | Hb (g/L) | Reti (rel., %) | Reti (abs., x 10 <sup>3</sup> /μl) | Reti He (pg) | RPI | Neutrophils (x 10 <sup>3</sup> /μl) | Lymphocytes (x 10 <sup>3</sup> /μl) | Monocytes (x 10 <sup>3</sup> /μl) | Eosinophils (x 10 <sup>3</sup> /μl) | Basophils (x 10 <sup>3</sup> /μl) | Mean Platelet volume (fL) | Immature granulocytes (x 10 <sup>3</sup> /μl) | Mean Platelet volume (fL)2 | Immature granulocytes (Tsd/μl) |
|-----------------|-----------------------------------|-----------|---------|----------|----------------|------------------------------------|--------------|-----|-------------------------------------|-------------------------------------|-----------------------------------|-------------------------------------|-----------------------------------|---------------------------|-----------------------------------------------|----------------------------|--------------------------------|
| 44y11m          | 4.01                              | 89.3      | 35.8    | 123      | 1.6            | 63.8                               | 34.6         | 0.9 | 3.94                                | 190                                 | 1.76                              | 1.6                                 | 0.44                              | 0.12                      | 0.02                                          | 10.4                       | 0.02                           |
| reference range | 4.44-5.61                         | 81.8-95.5 | 40-49.4 | 135-169  | 0.4-1.36       | 23-70.1                            | 32.1-38.8    | 0.9 | 3.91-10.9                           | 166-309                             | 1.8-6.98                          | 1.26-3.35                           | 0.29-0.95                         | 0.03-0.59                 | 0.01-0.07                                     | 9.3-12.1                   | <0.06                          |

### Mother Patient 1 (heterozygous)

| Age             | Erc count (x 10 <sup>6</sup> /μl) | MCV fl  | Hkt %   | Hb (g/L) | Reti (rel., %) | Reti (abs., x 10 <sup>3</sup> /μl) | Reti He (pg) | RPI | Neutrophils (x 10 <sup>3</sup> /μl) | Lymphocytes (x 10 <sup>3</sup> /μl) | Monocytes (x 10 <sup>3</sup> /μl) | Eosinophils (x 10 <sup>3</sup> /μl) | Basophils (x 10 <sup>3</sup> /μl) | Mean Platelet volume (fL) | Immature granulocytes (x 10 <sup>3</sup> /μl) | Mean Platelet volume (fL)2 | Immature granulocytes (Tsd/μl) |
|-----------------|-----------------------------------|---------|---------|----------|----------------|------------------------------------|--------------|-----|-------------------------------------|-------------------------------------|-----------------------------------|-------------------------------------|-----------------------------------|---------------------------|-----------------------------------------------|----------------------------|--------------------------------|
| 36y1m           | 4.12                              | 92.2    | 38      | 124      | 1.8            | 75                                 | 35.3         | 1.2 | 6.73                                | 274                                 | 3.9                               | 2.06                                | 0.56                              | 0.19                      | 0.02                                          | 10.4                       | 0.03                           |
| reference range | 3.92-5.08                         | 82.9-98 | 36.6-44 | 119-146  | 0.4-1.36       | 17-63.8                            | 32.1-38.8    | 2-3 | 4.49-12.68                          | 173-390                             | 2.1-8.89                          | 1.26-3.35                           | 0.25-0.84                         | 0.01-0.4                  | 0.01-0.07                                     | 9.1-11.9                   | < 0.06                         |

### Brother Patient 1 (heterozygous)

| Age             | Erc count (x 10 <sup>6</sup> /μl) | MCV fl    | Hkt %     | Hb (g/L) | Reti (rel., %) | Reti (abs., x 10 <sup>3</sup> /μl) | Reti He (pg) | RPI | Neutrophils (x 10 <sup>3</sup> /μl) | Lymphocytes (x 10 <sup>3</sup> /μl) | Monocytes (x 10 <sup>3</sup> /μl) | Eosinophils (x 10 <sup>3</sup> /μl) | Basophils (x 10 <sup>3</sup> /μl) | Mean Platelet volume (fL) | Immature granulocytes (x 10 <sup>3</sup> /μl) |
|-----------------|-----------------------------------|-----------|-----------|----------|----------------|------------------------------------|--------------|-----|-------------------------------------|-------------------------------------|-----------------------------------|-------------------------------------|-----------------------------------|---------------------------|-----------------------------------------------|
| 13y6m           | 4.47                              | 86.8      | 38.8      | 126      | 1.2            | 55.9                               | 33.7         | 0.8 | 1.78                                | 2.32                                | 0.56                              | 0.28                                | 0.01                              | 9.5                       | 0.02                                          |
| reference range | 4.02-5.29                         | 76.7-89.2 | 33.9-43.5 | 116-145  | 0.9-1.5        | 42-65                              | 27-33.2      | 2-3 | 1.54-7.04                           | 0.97-3.26                           | 0.18-0.78                         | 0.04-0.38                           | 0.01-0.05                         | 9.6-11.8                  | <0.03                                         |

### Father Patient 3 (heterozygous)

| Age             | Erc count (x 10 <sup>12</sup> /L) | MCV (fL) | Hkt (%)   | Hb (g/L) | Reti (rel., %) | Reti (abs., x 10 <sup>3</sup> /μL) | Reti He (pg) | RPI | Neutrophils (x 10 <sup>9</sup> /L) | Lymphocytes (x 10 <sup>9</sup> /L) | Eosinophils (x 10 <sup>9</sup> /L) | Basophils (x 10 <sup>9</sup> /L) | Monocytes (x 10 <sup>9</sup> /L) |
|-----------------|-----------------------------------|----------|-----------|----------|----------------|------------------------------------|--------------|-----|------------------------------------|------------------------------------|------------------------------------|----------------------------------|----------------------------------|
| 40y1m           | 4.8                               | 85       | 41        | 141      | N/A            | N/A                                | N/A          | N/A | 2.37                               | 1.64                               | 0.08                               | 0.02                             | 0.35                             |
| reference range | 4.3-5.75                          | 80-99    | 39.5-50.5 | 135-172  |                |                                    |              |     | 1.5-7.7                            | 1.1-4.5                            | 0.02-0.5                           | 0-0.2                            | 0.1-0.9                          |

### Mother Patient 3 (heterozygous)

| Age             | Erc count (x 10 <sup>12</sup> /L) | MCV (fL) | Hkt (%) | Hb (g/L) | Reti (rel., %) | Reti (abs., x 10 <sup>3</sup> /μL) | Reti He (pg) | RPI | Neutrophils (x 10 <sup>9</sup> /L) | Lymphocytes (x 10 <sup>9</sup> /L) | Eosinophils (x 10 <sup>9</sup> /L) | Basophils (x 10 <sup>9</sup> /L) | Monocytes (x 10 <sup>9</sup> /L) |
|-----------------|-----------------------------------|----------|---------|----------|----------------|------------------------------------|--------------|-----|------------------------------------|------------------------------------|------------------------------------|----------------------------------|----------------------------------|
| 33y11m          | 4.8                               | 83       | 40      | 138      | N/A            | N/A                                | N/A          | N/A | 2.37                               | 1.64                               | 0.08                               | 0.02                             | 0.35                             |
| reference range | 3.9-5.15                          | 80-99    | 35.5-45 | 120-154  |                |                                    |              |     | 1.5-7.7                            | 1.1-4.5                            | 0.02-0.5                           | 0-0.2                            | 0.1-0.9                          |

### Sister A Patient 3 (heterozygous)

| Age             | Erc count (x 10 <sup>12</sup> /L) | MCV (fL) | Hkt (%) | Hb (g/L) | Reti (rel., %) | Reti (abs., x 10 <sup>3</sup> /μL) | Reti He (pg) | RPI | Neutrophils (x 10 <sup>9</sup> /L) | Lymphocytes (x 10 <sup>9</sup> /L) | Eosinophils (x 10 <sup>9</sup> /L) | Basophils (x 10 <sup>9</sup> /L) | Monocytes (x 10 <sup>9</sup> /L) |
|-----------------|-----------------------------------|----------|---------|----------|----------------|------------------------------------|--------------|-----|------------------------------------|------------------------------------|------------------------------------|----------------------------------|----------------------------------|
| 15y1m           | 4.2                               | 90       | 38      | 129      | N/A            | N/A                                | N/A          | N/A | 3.03                               | 1.6                                | 0.03                               | 0.01                             | 0.31                             |
| reference range | 3.9-5.15                          | 78-93    | 35.5-45 | 120-154  |                |                                    |              |     | 1.7-7.9                            | 1.2-5.0                            | 0.02-0.65                          | 0-0.2                            | 0.1-0.95                         |

### Sister B Patient 3 (heterozygous)

| Age             | Erc count (x 10 <sup>12</sup> /L) | MCV (fL) | Hkt (%) | Hb (g/L) | Reti (rel., %) | Reti (abs., x 10 <sup>3</sup> /μL) | Reti He (pg) | RPI | Neutrophils (x 10 <sup>9</sup> /L) | Lymphocytes (x 10 <sup>9</sup> /L) | Eosinophils (x 10 <sup>9</sup> /L) | Basophils (x 10 <sup>9</sup> /L) | Monocytes (x 10 <sup>9</sup> /L) |
|-----------------|-----------------------------------|----------|---------|----------|----------------|------------------------------------|--------------|-----|------------------------------------|------------------------------------|------------------------------------|----------------------------------|----------------------------------|
| 13y11m          | 4.8                               | 84       | 40      | 138      | N/A            | N/A                                | N/A          | N/A | 3.59                               | 2.12                               | 0.07                               | 0.02                             | 0.31                             |
| reference range | 3.9-5.15                          | 78-93    | 35.5-45 | 120-154  |                |                                    |              |     | 1.7-7.9                            | 1.2-5.0                            | 0.02-0.65                          | 0-0.2                            | 0.1-0.95                         |

**Sister C Patient 3 (heterozygous)**

| Age             | Erc count (x 10 <sup>12</sup> /L) | MCV (fL) | Hkt (%) | Hb (g/L) | Reti (rel., %) | Reti (abs., x 10 <sup>3</sup> /μL) | Reti He (pg) | RPI | Neutrophils (x 10 <sup>9</sup> /L) | Lymphocytes (x 10 <sup>9</sup> /L) | Eosinophils (x 10 <sup>9</sup> /L) | Basophils (x 10 <sup>9</sup> /L) | Monocytes (x 10 <sup>9</sup> /L) |
|-----------------|-----------------------------------|----------|---------|----------|----------------|------------------------------------|--------------|-----|------------------------------------|------------------------------------|------------------------------------|----------------------------------|----------------------------------|
| 12y2m           | 4.8                               | 75       | 36      | 125      | N/A            | N/A                                | N/A          | N/A | 1.24                               | 1.31                               | 0.06                               | 0.06                             | 0.16                             |
| reference range | 3.9-5.15                          | 78-93    | 35.5-45 | 120-154  |                |                                    |              |     | 1.7-7.9                            | 1.2-5.0                            | 0.02-0.65                          | 0-0.2                            | 0.1-0.95                         |

## VI. Supplementary Table 5. Comparison of C112X *SOD1* homozygous iSODDES with D90A *SOD1* homozygous and G127X

### *SOD1* heterozygous ALS

|                                                   | <i>SOD1</i> genotype                                                              |                                                                                                                                            |                                                                                                                                      |                                                                       |
|---------------------------------------------------|-----------------------------------------------------------------------------------|--------------------------------------------------------------------------------------------------------------------------------------------|--------------------------------------------------------------------------------------------------------------------------------------|-----------------------------------------------------------------------|
|                                                   | C112X/C112X                                                                       | C112X/wt                                                                                                                                   | D90A /D90A                                                                                                                           | G127X/wt                                                              |
| Zygosity                                          | hom                                                                               | het                                                                                                                                        | hom                                                                                                                                  | het                                                                   |
| Enzymatic activity in RBC                         | zero (devoid)                                                                     | 50%                                                                                                                                        | normal                                                                                                                               | ≈45%                                                                  |
| Length of mutant protein                          | predicted truncated                                                               |                                                                                                                                            | normal length (?)                                                                                                                    | 131 aa long                                                           |
| Hematological abnormalities                       | mild anemia with decreased glutathione                                            | none                                                                                                                                       | none                                                                                                                                 | none                                                                  |
| Gross liver & kidney blood parameters             | normal                                                                            | normal                                                                                                                                     | normal                                                                                                                               | normal                                                                |
| Skin fibroblasts in culture                       | only grow when PO2 is reduced to 2% and with ascorbate in the culture medium      | normal growth                                                                                                                              | easily grown                                                                                                                         | normal growth                                                         |
| Mutant SOD1 protein detectable in fibroblasts     | only with proteasome inhibition                                                   | only with proteasome inhibition                                                                                                            | Yes                                                                                                                                  | Yes                                                                   |
| Mutant SOD1 aggregation detectable in fibroblasts | no                                                                                | no                                                                                                                                         | no                                                                                                                                   | only with proteasome inhibition                                       |
| Age at onset of motor symptoms                    | 6-12 months of age                                                                | none                                                                                                                                       | 20-94 years median 47 years                                                                                                          | ≈50 years                                                             |
| First symptom(s) observed                         | motor                                                                             | none                                                                                                                                       | frequently neuralgic lumbago, then motor                                                                                             | motor only                                                            |
| First reported motor symptom or sign              | hypotonia of truncal muscles                                                      | none                                                                                                                                       | asymmetrical increased muscle tone and brisk reflexes in one leg, later also in the opposite leg before ascending to the upper limbs | asymmetrical LMN & UMN paresis in a limb or truncal innervated muscle |
| Second motor symptom/sign                         | increased muscle tone and brisk DTRs in the limbs, probably first in the legs (?) | none                                                                                                                                       | LMN involvement then dominates first in the legs, later also in the arms and bulbar innervated muscles                               | spread from one limb to all limbs and bulbar innervated muscles       |
| Bulbar involvement                                | yes and early, UMN dominant                                                       | none                                                                                                                                       | yes but late, both UMN and LMN with severe tongue atrophy                                                                            | yes, early LMN dominant                                               |
| Affective lability (in all mild)                  | yes, first noted >10 y after onset                                                | none                                                                                                                                       | yes, >10 years after onset of motor symptoms                                                                                         | yes                                                                   |
| Gross motor disease progression estimate          | fast, then slow?                                                                  | n a                                                                                                                                        | invariably very slow                                                                                                                 | fast                                                                  |
| Survival time from onset                          | ?                                                                                 | (normal life span?)                                                                                                                        | 14.2 years                                                                                                                           | 2.8 years                                                             |
| Neurological phenotype                            | uniform                                                                           | (uniform in the sense that none of them have an MND or other distinct neurological phenotype, n = 10 with the oldest being <45 years old ) | strictly uniform for site of onset and disease progression rate                                                                      | highly variable for site of onset but invariably rapid progression    |
| Urinary bladder involvement                       | urgency of micturition<br>4/8 patients                                            | no                                                                                                                                         | frequently urgency of micturition (also observed in tg-D90A hSOD1 mice model)                                                        | no                                                                    |
| Non-neurological findings                         | yes                                                                               | no                                                                                                                                         | no                                                                                                                                   | no                                                                    |
| Cortical atrophy of the cerebrum                  | yes                                                                               | not studied                                                                                                                                | no                                                                                                                                   | no                                                                    |
| Progressive vermis cerebelli atrophy              | yes                                                                               | not studied                                                                                                                                | no                                                                                                                                   | no                                                                    |
| Brain stem atrophy on MRI                         | yes                                                                               | not studied                                                                                                                                | no                                                                                                                                   | no                                                                    |
| Source:                                           | this report                                                                       | this report                                                                                                                                | Modified from Andersen PM et al., Brain 1996;119:1153-1172                                                                           | Modified from Andersen PM et al., Brain 1997;120:1723-1737            |

DTR, deep tendon stretch reflexes

LMN, lower motor neuron ("secondary" motor neuron)

UMN, upper motor neuron ("first" motor neuron) and associated tracts

aa, amino acids

## VII. Supplementary Methods

### Immunoblots of fibroblast cultures heterozygous for SOD1 p.C112Wfs\*11

Fibroblast cell lines from the mother (M2) and father (F2) of patient 2 were established.

We used in house generated fibroblast lines derived from WT controls and ALS patients carrying the ALS-associated truncation mutation p.G127X in SOD1 for comparison.

Fibroblasts were cultured to 70-80% confluency, and incubated for 24 hours with, or without, bortezomib 5 ng/ml before harvest and storage of cell pellets at -80°C.

Quantification of soluble misfolded SOD1 was done following a published protocol<sup>3</sup> on cells harvested with 40 mM iodoacetamide to prevent any oxidation of reduced cysteines to disulfide bridges and refolding during sample preparation. Cell lysates or hemolysates were loaded on Any kD Stain free Criterion TGX precast gels. Gels were activated and protein load images captured using a Geldoc imager, before blotting on nitrocellulose filters. Primary rabbit anti-human SOD1 antibodies raised against peptides corresponding to aa 25-40 (1 µg/ml) or aa 5-21 (1 µg/ml) and were analyzed by western blotting using Any kD Criterion TGX precast gels (BioRad Laboratories, Hercules, CA, USA). To allow specific detection of the C112X mutant protein, we used a rabbit polyclonal antibody against a peptide corresponding to the first 8 aa:s (*italics*) of the 11-aa long neo-peptide ***GDHWHHPHTG*** in the C-terminal end of the C112X neo-peptide (10 µg/ml)<sup>2</sup>. The G127X protein was detected using an antibody generated in the same way using a peptide corresponding to the C-terminal end, including aa 123–127 of the SOD1 sequence and the GQRWK neo-peptide (2µg/ml)<sup>5,6</sup>. Horseradish peroxidase (HRP)-conjugated secondary anti-rabbit IgG; 1:10,000, Dako, Glostrup, Denmark). ECL Select reagent (GE Healthcare Biosciences, Chicago, IL, USA) was used to detect the signal. Images were acquired using a Chemidoc apparatus and analyzed using ImageLab software.



### **LC-MS analysis of GSH, GSSG and ascorbate**

Following initial sample preparation as outlined in the main manuscript, all mixed samples were then homogenized in a bead mill (Retsch MM400) at 30 oscillations/s for 1 min, followed by centrifugation at 14 000 rpm for 20 minutes (Hettich Zentrifugen). 150  $\mu$ L of the supernatant was transferred to a spin filter (Ultrafree MC, 0.22  $\mu$ m, Millipore, Burlington, MA, USA) and centrifuged at + 4°C, 14000 rpm for 10 min to remove any remaining protein precipitate. 35  $\mu$ L of the filtered extract was transferred to an LC-MS vial and further diluted with 65  $\mu$ L of 2.5% MPA prior to LC-MS analysis (the final concentration of MPA in the vial was 2.5%). 1  $\mu$ L was injected and analyzed by LC-ESI-MSMS on a 1290 Infinity system from Agilent Technologies (Waldbronn, Germany) coupled to an Agilent 6490 Triple quadrupole mass spectrometer. The chromatographic separation was achieved using an Acquity UPLC HSS T3 column (2.1 x 100 mm, particle size 1.8  $\mu$ m), thermostated at 40 °C. Analyses were performed as previously described (4, 5).

## VIII. Uncropped blots for Figures 3 and 4

### A. Uncropped blots and gel for Fig. 3

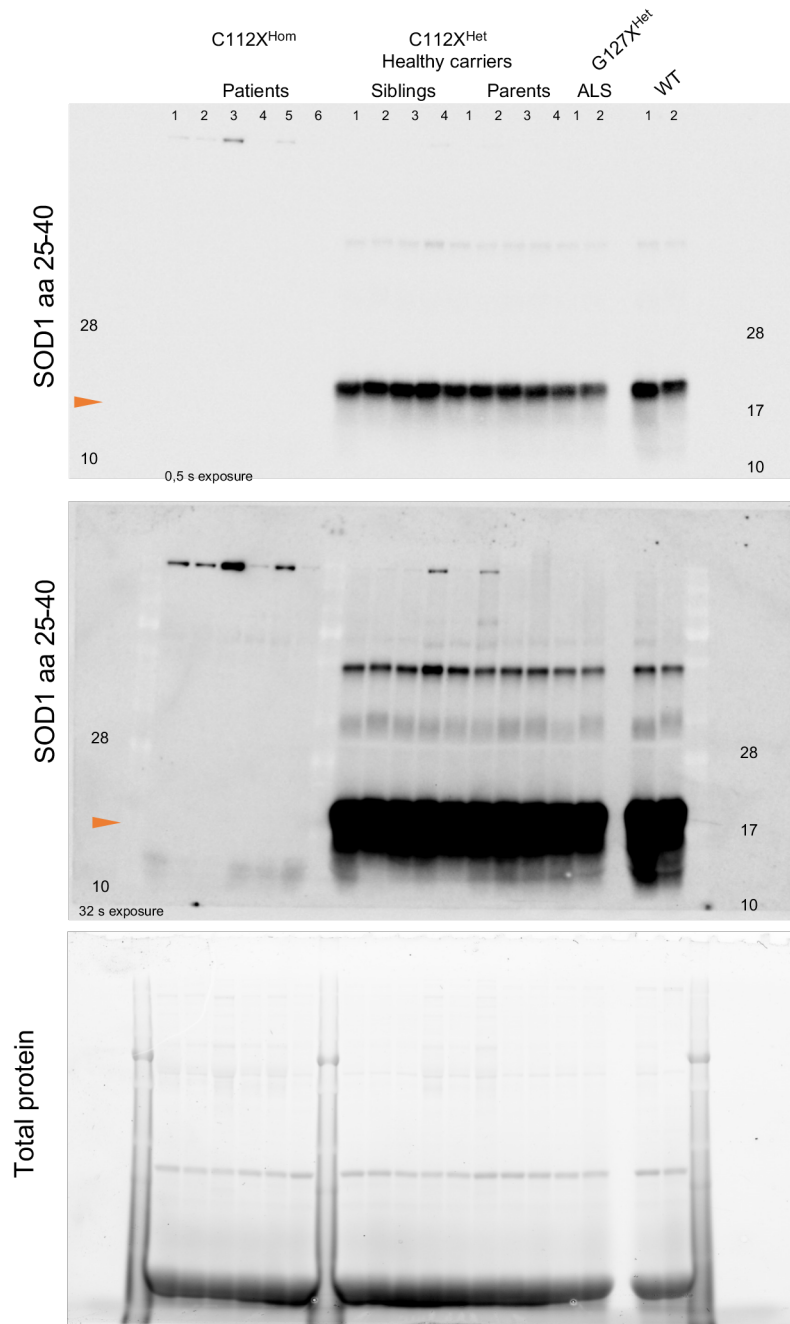

Red arrow indicates mobility of SOD1 C112X truncation variant.

B. Uncropped blots for Figure 4

**Soluble fraction**

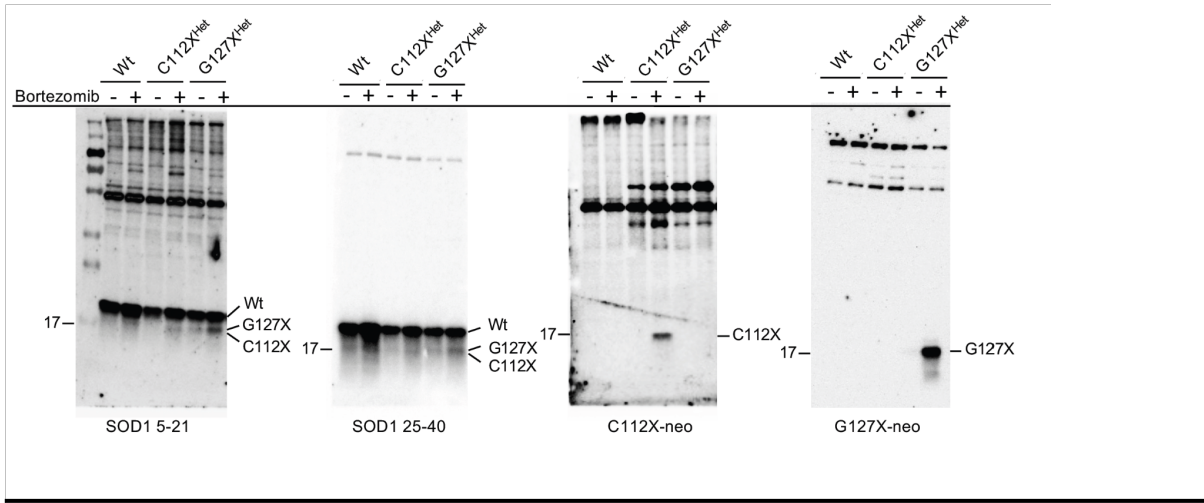

**Insoluble fraction**

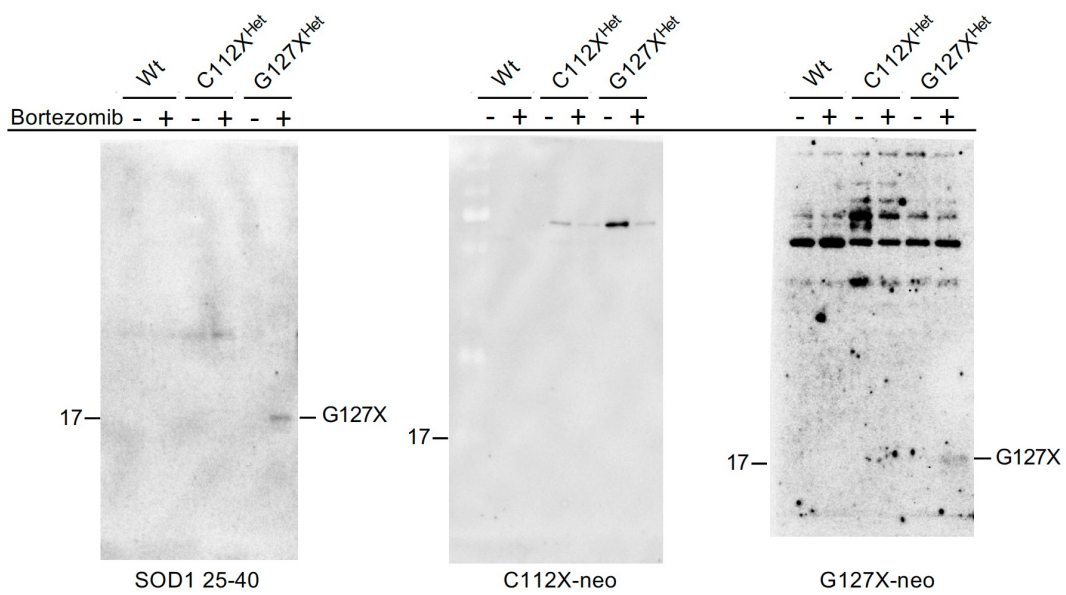

## IX. References

1. Park JH, Elpers C, Reunert J, et al. SOD1 deficiency: a novel syndrome distinct from amyotrophic lateral sclerosis. *Brain*. 2019;142(8):2230-2237.
2. Andersen PM, Nordstrom U, Tsiakas K, et al. Phenotype in an Infant with SOD1 Homozygous Truncating Mutation. *N Engl J Med*. 2019;381(5):486-488.
3. Keskin I, Forsgren E, Lehmann M, et al. The molecular pathogenesis of superoxide dismutase 1-linked ALS is promoted by low oxygen tension. *Acta Neuropathol*. 2019;138(1):85-101.
4. Ekhtiari Bidhendi E, Bergh J, Zetterstrom P, et al. Mutant superoxide dismutase aggregates from human spinal cord transmit amyotrophic lateral sclerosis. *Acta Neuropathol*. 2018;136(6):939-953.
5. Claeson AS, Gouveia-Figueira S, Stenlund H, Johansson AI. A standardized protocol for comparable analysis of GSH/GSSG by UHPLC-ESI-MS/MS for human plasma. *J Chromatogr B Analyt Technol Biomed Life Sci*. 2019;1104:67-72.
6. Cao L, Waldon D, Teffera Y, et al. Ratios of biliary glutathione disulfide (GSSG) to glutathione (GSH): a potential index to screen drug-induced hepatic oxidative stress in rats and mice. *Anal Bioanal Chem*. 2013;405(8):2635-2642.
